# Supplementary material for: In silico studies with substituted adenines to achieve a remarkable stability of mispairs with thymine nucleobase
Source: Royal Society of Chemistry journal article supplement (doi:10.1039/c5nj02311d), 2015-12-08
Supplement: c5nj02311d1.pdf [file c5nj02311d1.pdf]

## Supporting Information

### In Silico Studies with Substituted Adenines to Achieve Remarkable Stability of Mispairs with Thymine Nucleobase

Kalyanashis Jana<sup>[1,2]</sup> and Bishwajit Ganguly<sup>[1,2]</sup>\*

<sup>1</sup>Computation and Simulation Unit (Analytical Discipline and Centralized Instrument Facility), CSIR–Central Salt and Marine Chemicals Research Institute, Bhavnagar–364002, India.

<sup>2</sup>Academy of Scientific and Innovative Research, CSIR–CSMCRI, Bhavnagar, Gujarat–364002, India.

\* To whom correspondence should be addressed. E-mail: [ganguly@csmcri.org](mailto:ganguly@csmcri.org)

| Sr. No. | Name                                                                                                                                | Page No. |
|---------|-------------------------------------------------------------------------------------------------------------------------------------|----------|
| 1       | M06-2X/6-31+G(d,p) level of theory optimized Cartesian coordinate and zero-point corrected electronic energies of studied mispairs. | 2-9      |
| 2       | The M06-2X-D3 level of theory calculated energies and free energies for representative system.                                      | 9        |
| 3       | Trajectory Analysis                                                                                                                 | 10-12    |
| 4       | Solvation free energies of representative system. Energy values are given in kcal/mol.                                              | 13       |
| 5       | H-Bond Energy Calculations using three different methods                                                                            | 13       |
| 6       | The deprotonation energies of the ANH2 and AOH nucleobases before and after lithiation.                                             | 13       |
| 7       | Topological analysis of noncovalent hydrogen bonding interactions                                                                   | 14       |

The M06-2X/6-31+G(d,p) level of theory optimized Cartesian coordinates and zero-point corrected electronic energies free energies and zero-point corrections of studied mispairs. All the energy values are given in Hatree.

| <b>A-T</b>                                        |             |             |             | <b>ANH<sub>2</sub>-T</b>                            |             |             |             |
|---------------------------------------------------|-------------|-------------|-------------|-----------------------------------------------------|-------------|-------------|-------------|
| E=-920.939329<br>G=-920.985368<br>ZPE= 0.230922   |             |             |             | E= -976.283210<br>G= -976.328225<br>ZPE= 0.247751   |             |             |             |
| N                                                 | 4.94651600  | 0.55970800  | 0.00027500  | N                                                   | -4.99138400 | 0.20361500  | 0.00024900  |
| C                                                 | 5.20824100  | -0.79128700 | 0.00034900  | C                                                   | -5.14536400 | -1.17069300 | 0.00093900  |
| H                                                 | 6.22048500  | -1.17117500 | 0.00050200  | H                                                   | -6.12429500 | -1.62939300 | 0.00137700  |
| N                                                 | 4.12870300  | -1.52642500 | 0.00019700  | N                                                   | -4.01024100 | -1.81129300 | 0.00098200  |
| C                                                 | 3.09975200  | -0.60724000 | 0.00000900  | C                                                   | -3.05915500 | -0.80794400 | 0.00036100  |
| C                                                 | 1.69548900  | -0.75632100 | -0.00018700 | C                                                   | -1.64732500 | -0.83889600 | -0.00004500 |
| N                                                 | 1.09167900  | -1.95116200 | -0.00019000 | N                                                   | -0.98462900 | -2.00424500 | -0.00005500 |
| H                                                 | 0.07386800  | -2.01695600 | -0.00038800 | H                                                   | 0.03182800  | -2.04209300 | -0.00021600 |
| H                                                 | 1.65969500  | -2.78336000 | -0.00023600 | H                                                   | -1.52414800 | -2.85544300 | 0.00077600  |
| N                                                 | 0.95539100  | 0.36774800  | -0.00031800 | N                                                   | -0.97616100 | 0.32429800  | -0.00065100 |
| C                                                 | 1.56012000  | 1.57118700  | -0.00021000 | C                                                   | -1.68559500 | 1.48982700  | -0.00084900 |
| H                                                 | 0.88185200  | 2.42175300  | -0.00028500 | N                                                   | -3.01742900 | 1.63091800  | -0.00070100 |
| N                                                 | 2.86021300  | 1.82847900  | 0.00000600  | C                                                   | -3.64271500 | 0.45191400  | -0.00009000 |
| C                                                 | 3.58165400  | 0.69811200  | 0.00010000  | H                                                   | -5.71883300 | 0.90193300  | 0.00008300  |
| H                                                 | 5.61574500  | 1.31472700  | 0.00035300  | N                                                   | 3.95787100  | 1.44650000  | 0.00094300  |
| N                                                 | -3.81150500 | 1.60210800  | 0.00031000  | C                                                   | 4.66314700  | 0.26386700  | 0.00070500  |
| C                                                 | -4.54470400 | 0.43724000  | 0.00044700  | H                                                   | 5.74329300  | 0.36573800  | 0.00111200  |
| H                                                 | -5.62221800 | 0.56647700  | 0.00081100  | C                                                   | 4.04943600  | -0.93520600 | 0.00000600  |
| C                                                 | -3.96648500 | -0.78128700 | 0.00017000  | C                                                   | 2.58315900  | -0.94975000 | -0.00056000 |
| C                                                 | -4.71827600 | -2.07639500 | 0.00029700  | O                                                   | 1.92768100  | -1.98506900 | -0.00140200 |
| H                                                 | -4.45699400 | -2.67230900 | -0.87871800 | N                                                   | 1.95407800  | 0.28818400  | -0.00000900 |
| H                                                 | -4.45568000 | -2.67283000 | 0.87856000  | H                                                   | 0.90612500  | 0.30276900  | -0.00025300 |
| H                                                 | -5.79667400 | -1.90147000 | 0.00113900  | C                                                   | 2.57976000  | 1.51005100  | 0.00067000  |
| C                                                 | -2.50162500 | -0.83452200 | -0.00020200 | O                                                   | 1.98780300  | 2.57947400  | 0.00103100  |
| O                                                 | -1.86480200 | -1.88617000 | -0.00034300 | H                                                   | 4.42832900  | 2.34019100  | 0.00150200  |
| N                                                 | -1.84770700 | 0.38259200  | -0.00060200 | N                                                   | -0.95961100 | 2.63098900  | -0.00120700 |
| H                                                 | -0.79524400 | 0.36712200  | -0.00051300 | H                                                   | 0.05369100  | 2.62663400  | -0.00115500 |
| C                                                 | -2.42601100 | 1.62966800  | -0.00009300 | H                                                   | -1.46445200 | 3.50065900  | -0.00181300 |
| O                                                 | -1.79215300 | 2.66936300  | -0.00012000 | C                                                   | 4.76040200  | -2.25279000 | -0.00029500 |
| H                                                 | -4.26116100 | 2.50621600  | 0.00065000  | H                                                   | 4.47941900  | -2.84045500 | 0.87796800  |
|                                                   |             |             |             | H                                                   | 4.47981000  | -2.83983300 | -0.87909500 |
|                                                   |             |             |             | H                                                   | 5.84338400  | -2.11098800 | 0.00000900  |
| <b>AOH-T</b>                                      |             |             |             | <b><sup>Br</sup>ANH<sub>2</sub>-T</b>               |             |             |             |
| E= -996.157780<br>G= -996.204027<br>ZPE= 0.235945 |             |             |             | E= -3547.494917<br>G= -3547.543179<br>ZPE= 0.237558 |             |             |             |
| N                                                 | 4.95346000  | 0.21447900  | 0.00065000  | N                                                   | 3.55823300  | 1.11836400  | 0.00020500  |
| C                                                 | 5.11538400  | -1.15688300 | 0.00016700  | C                                                   | 3.89690300  | -0.21753900 | -0.00024600 |
| H                                                 | 6.09711600  | -1.60972300 | 0.00027700  | N                                                   | 2.88742300  | -1.02504300 | -0.00039900 |
| N                                                 | 3.98475200  | -1.80686300 | -0.00032400 | C                                                   | 1.79538100  | -0.17072000 | -0.00005900 |
| C                                                 | 3.02791400  | -0.80999600 | -0.00026100 | C                                                   | 0.40509600  | -0.41529400 | 0.00000700  |
| C                                                 | 1.61854200  | -0.84711500 | -0.00076700 | N                                                   | -0.07709100 | -1.66524400 | -0.00029500 |
| N                                                 | 0.95153700  | -2.00994200 | -0.00174600 | H                                                   | -1.07736300 | -1.85265100 | 0.00000500  |
| H                                                 | -0.06520500 | -2.05559500 | -0.00076000 | H                                                   | 0.58058800  | -2.42881100 | -0.00059100 |
| H                                                 | 1.48989200  | -2.86228600 | -0.00110800 | N                                                   | -0.43037400 | 0.63646000  | 0.00042000  |
| N                                                 | 0.95146100  | 0.32238000  | -0.00036100 | C                                                   | 0.09506200  | 1.89453700  | 0.00076500  |
| C                                                 | 1.65734700  | 1.48351700  | 0.00044900  | N                                                   | 1.39328500  | 2.23344000  | 0.00077000  |
| N                                                 | 2.97399600  | 1.63153900  | 0.00076400  | C                                                   | 2.18321000  | 1.16221500  | 0.00036200  |
| C                                                 | 3.60416900  | 0.45365500  | 0.00042700  | H                                                   | 4.19199000  | 1.90326500  | 0.00035700  |
| H                                                 | 5.67547900  | 0.91906700  | 0.00101800  | N                                                   | -5.47622800 | 1.01253900  | -0.00035500 |
| N                                                 | -3.83341700 | 1.50824100  | -0.00047200 | C                                                   | -5.99754400 | -0.26226500 | -0.00014800 |
| C                                                 | -4.60381500 | 0.36473200  | 0.00000400  | H                                                   | -7.08078900 | -0.32223900 | -0.00031300 |
| H                                                 | -5.67628600 | 0.52792600  | -0.00006800 | C                                                   | -5.21280500 | -1.35691000 | 0.00024300  |
| C                                                 | -4.06046100 | -0.86879100 | 0.00044400  | C                                                   | -3.76114700 | -1.15368100 | 0.00043800  |
| C                                                 | -2.59788600 | -0.96843200 | 0.00041000  | O                                                   | -2.95812400 | -2.07947300 | 0.00086200  |
| O                                                 | -1.99306700 | -2.03436500 | 0.00060200  | N                                                   | -3.32408100 | 0.16404700  | 0.00014400  |
| N                                                 | -1.90614800 | 0.23382900  | 0.00004800  | H                                                   | -2.29131800 | 0.33408400  | 0.00026200  |
| H                                                 | -0.85567500 | 0.21603600  | -0.00001700 | C                                                   | -4.12342400 | 1.27991200  | -0.00023200 |
| C                                                 | -2.45780400 | 1.48541800  | -0.00045600 | O                                                   | -3.69523000 | 2.42494900  | -0.00045700 |
| O                                                 | -1.79131300 | 2.51425100  | -0.00087100 | H                                                   | -6.07461300 | 1.82620500  | -0.00067200 |
| H                                                 | -4.25298200 | 2.42724700  | -0.00070900 | N                                                   | -0.79077700 | 2.91402400  | 0.00117900  |
| C                                                 | -4.84808200 | -2.14231200 | 0.00084500  | H                                                   | -1.79263000 | 2.75896600  | 0.00083700  |

|                   |             |             |             |                                         |             |             |             |
|-------------------|-------------|-------------|-------------|-----------------------------------------|-------------|-------------|-------------|
| H                 | -4.60137300 | -2.74482600 | -0.87769000 | H                                       | -0.42107400 | 3.84928800  | 0.00130800  |
| H                 | -4.60146000 | -2.74422100 | 0.87981900  | C                                       | -5.72096100 | -2.76529800 | 0.00050300  |
| H                 | -5.92089800 | -1.93756900 | 0.00071700  | H                                       | -5.35590000 | -3.30448000 | -0.87806400 |
| O                 | 0.96604700  | 2.61690500  | 0.00040100  | H                                       | -5.35613900 | -3.30406700 | 0.87942100  |
| H                 | -0.00328200 | 2.47122000  | -0.00001800 | H                                       | -6.81304500 | -2.78544900 | 0.00035600  |
| <b>Br AOH-T</b>   |             |             |             | <b>COOH ANH<sub>2</sub>-T</b>           |             |             |             |
| E= -3567.368880   |             |             |             | E= -1164.789386                         |             |             |             |
| G= -3567.418175   |             |             |             | G= -1164.839222                         |             |             |             |
| ZPE= 0.225748     |             |             |             | ZPE= 0.262760                           |             |             |             |
| N                 | 3.52502700  | 1.11631000  | 0.00050900  | N                                       | 3.97822400  | 0.99533800  | 0.00012000  |
| C                 | 3.87183700  | -0.21606600 | 0.00014200  | C                                       | 4.29969300  | -0.34826700 | -0.00039600 |
| N                 | 2.86735600  | -1.03159700 | -0.00041400 | N                                       | 3.24910500  | -1.13033600 | -0.00060200 |
| C                 | 1.77087300  | -0.18445600 | -0.00032900 | C                                       | 2.19326400  | -0.25948500 | -0.00018400 |
| C                 | 0.38406300  | -0.43429800 | -0.00068500 | C                                       | 0.79090800  | -0.47201100 | -0.00010600 |
| N                 | -0.10412100 | -1.68192500 | -0.00129800 | N                                       | 0.28596800  | -1.71043200 | -0.00048800 |
| H                 | -1.10374300 | -1.87583300 | -0.00093600 | H                                       | -0.71836600 | -1.87863700 | -0.00013300 |
| H                 | 0.55165600  | -2.44757800 | -0.00107200 | H                                       | 0.92975400  | -2.48628900 | -0.00073100 |
| N                 | -0.44794200 | 0.62491400  | -0.00048900 | N                                       | -0.01733900 | 0.59630000  | 0.00034000  |
| C                 | 0.07460300  | 1.87752900  | 0.00004400  | C                                       | 0.53999800  | 1.84493900  | 0.00074300  |
| N                 | 1.35676800  | 2.22084200  | 0.00042600  | N                                       | 1.84331100  | 2.15749700  | 0.00073600  |
| C                 | 2.15121500  | 1.15124300  | 0.00021800  | C                                       | 2.61668800  | 1.07220900  | 0.00027000  |
| H                 | 4.15205700  | 1.90727300  | 0.00094400  | H                                       | 4.64454100  | 1.75544400  | 0.00034700  |
| N                 | -5.35444300 | 1.09507300  | -0.00033400 | N                                       | -5.05303700 | 1.08062000  | -0.00034800 |
| C                 | -5.94803200 | -0.14944700 | 0.00003800  | C                                       | -5.60194100 | -0.18265300 | -0.00012400 |
| H                 | -7.03280100 | -0.14570300 | 0.00013600  | H                                       | -6.68621700 | -0.21887500 | -0.00024900 |
| C                 | -5.23016600 | -1.29005500 | 0.00025800  | C                                       | -4.84160300 | -1.29458600 | 0.00022700  |
| C                 | -3.76906400 | -1.17453300 | 0.00008300  | C                                       | -3.38611700 | -1.12344500 | 0.00034800  |
| O                 | -3.01311500 | -2.13926500 | 0.00021000  | O                                       | -2.60241000 | -2.06589100 | 0.00062700  |
| N                 | -3.26226000 | 0.11668300  | -0.00024900 | N                                       | -2.92082300 | 0.18447800  | 0.00012200  |
| H                 | -2.22198200 | 0.25236600  | -0.00041100 | H                                       | -1.88546900 | 0.33269900  | 0.00022200  |
| C                 | -3.99107200 | 1.27409400  | -0.00050200 | C                                       | -3.69499000 | 1.31795200  | -0.00023000 |
| O                 | -3.48135500 | 2.38931300  | -0.00084700 | O                                       | -3.24024300 | 2.45273900  | -0.00043100 |
| H                 | -5.90485300 | 1.94225700  | -0.00051500 | H                                       | -5.63374600 | 1.90706500  | -0.00062400 |
| C                 | -5.82455800 | -2.66428700 | 0.00063800  | N                                       | -0.32543300 | 2.87910600  | 0.00128300  |
| H                 | -5.49434500 | -3.22496100 | -0.87822100 | H                                       | -1.33044500 | 2.74323000  | 0.00070700  |
| H                 | -5.49406400 | -3.22459300 | 0.87962500  | H                                       | 0.06227500  | 3.80737100  | 0.00122800  |
| H                 | -6.91571100 | -2.61649700 | 0.00079900  | C                                       | -5.38099900 | -2.69137600 | 0.00047700  |
| O                 | -0.77574400 | 2.89472400  | 0.00014900  | H                                       | -5.02833300 | -3.23860600 | -0.87817100 |
| H                 | -1.71415800 | 2.60874700  | -0.00033800 | H                                       | -5.02848800 | -3.23823000 | 0.87942000  |
| Br                | 5.66682200  | -0.70554600 | 0.00049800  | H                                       | -6.47323500 | -2.68703800 | 0.00037800  |
| <b>COOH AOH-T</b> |             |             |             | <b>NO<sub>2</sub> ANH<sub>2</sub>-T</b> |             |             |             |
| E= -1184.662519   |             |             |             | E= -1180.708242                         |             |             |             |
| G= -1184.713294   |             |             |             | G= -1180.759850                         |             |             |             |
| ZPE= 0.250938     |             |             |             | ZPE= 0.250454                           |             |             |             |
| N                 | 3.94281000  | 0.99555700  | 0.00073100  | N                                       | 4.00772700  | 0.94481100  | 0.00011900  |
| C                 | 4.27153800  | -0.34375100 | 0.00028800  | C                                       | 4.29167800  | -0.39829600 | -0.00037900 |
| N                 | 3.22845100  | -1.13520200 | -0.00040000 | N                                       | 3.25557700  | -1.17969000 | -0.00056500 |
| C                 | 2.16580500  | -0.27053200 | -0.00042900 | C                                       | 2.20771600  | -0.29850100 | -0.00018000 |
| C                 | 0.76736400  | -0.48847200 | -0.00091000 | C                                       | 0.80213100  | -0.50093600 | -0.00010700 |
| N                 | 0.25649100  | -1.72443300 | -0.00164400 | N                                       | 0.28424400  | -1.73164600 | -0.00045100 |
| H                 | -0.74733000 | -1.89908800 | -0.00114000 | H                                       | -0.72342000 | -1.88630800 | -0.00012700 |
| H                 | 0.89825300  | -2.50238400 | -0.00127100 | H                                       | 0.91534800  | -2.51819900 | -0.00071500 |
| N                 | -0.03771200 | 0.58717500  | -0.00070400 | N                                       | 0.00752800  | 0.57683400  | 0.00031400  |
| C                 | 0.51625900  | 1.83069000  | -0.00004100 | C                                       | 0.57390500  | 1.82034300  | 0.00069300  |
| N                 | 1.80327500  | 2.14762900  | 0.00049000  | N                                       | 1.88297500  | 2.12206300  | 0.00070500  |
| C                 | 2.58106000  | 1.06296000  | 0.00028100  | C                                       | 2.64212800  | 1.03170700  | 0.00026500  |
| H                 | 4.60262200  | 1.76203900  | 0.00126300  | H                                       | 4.68873700  | 1.69202100  | 0.00033800  |
| N                 | -4.93356400 | 1.15779000  | -0.00028600 | N                                       | -5.02562400 | 1.11433100  | -0.00039600 |
| C                 | -5.55195100 | -0.07458900 | 0.00017900  | C                                       | -5.58647300 | -0.14410600 | -0.00016400 |
| H                 | -6.63642900 | -0.04889700 | 0.00032400  | H                                       | -6.67100300 | -0.16950200 | -0.00029300 |
| C                 | -4.85760000 | -1.22984500 | 0.00041900  | C                                       | -4.83774400 | -1.26424400 | 0.00019800  |
| C                 | -3.39458900 | -1.14386400 | 0.00016700  | C                                       | -3.38126200 | -1.10768300 | 0.00033100  |
| O                 | -2.65730200 | -2.12322700 | 0.00029600  | O                                       | -2.60393900 | -2.05568600 | 0.00064300  |
| N                 | -2.86221300 | 0.13676200  | -0.00023100 | N                                       | -2.90457900 | 0.19605700  | 0.00007700  |
| H                 | -1.82009200 | 0.25178100  | -0.00043700 | H                                       | -1.87015000 | 0.33344500  | 0.00017800  |
| C                 | -3.56691600 | 1.30912400  | -0.00051200 | C                                       | -3.66619600 | 1.33788800  | -0.00029100 |
| O                 | -3.03300100 | 2.41292700  | -0.00093400 | O                                       | -3.19648600 | 2.46694300  | -0.00051800 |

|                                                     |             |             |             |                                                     |             |             |             |
|-----------------------------------------------------|-------------|-------------|-------------|-----------------------------------------------------|-------------|-------------|-------------|
| H                                                   | -5.46705100 | 2.01576700  | -0.00045600 | H                                                   | -5.59903500 | 1.94599300  | -0.00068900 |
| C                                                   | -5.47975400 | -2.59170400 | 0.00088900  | N                                                   | -0.27984400 | 2.86047300  | 0.00115200  |
| H                                                   | -5.16115800 | -3.15902700 | -0.87796900 | H                                                   | -1.28703000 | 2.73386000  | 0.00067700  |
| H                                                   | -5.16084800 | -3.15856400 | 0.87993400  | H                                                   | 0.11564000  | 3.78580300  | 0.00119500  |
| H                                                   | -6.56969200 | -2.52168400 | 0.00106200  | C                                                   | -5.39201600 | -2.65524400 | 0.00045700  |
| O                                                   | -0.31466400 | 2.86185200  | 0.00010200  | H                                                   | -5.04554400 | -3.20617000 | -0.87830500 |
| H                                                   | -1.25865400 | 2.59417400  | -0.00043100 | H                                                   | -5.04565400 | -3.20579400 | 0.87949600  |
| O                                                   | 6.58431000  | 0.10060900  | 0.00132200  | H                                                   | -6.48406500 | -2.63905800 | 0.00038200  |
| O                                                   | 5.89550100  | -2.04250700 | 0.00010800  | N                                                   | 5.66822200  | -0.82991400 | -0.00064200 |
| C                                                   | 5.69626200  | -0.72338700 | 0.00065300  | O                                                   | 6.50252300  | 0.06996700  | -0.00031600 |
| H                                                   | 6.85399500  | -2.18807200 | 0.00037400  | O                                                   | 5.89907700  | -2.01933600 | -0.00096400 |
| <b>NO<sub>2</sub>AOH-T</b>                          |             |             |             | <b>OHANH<sub>2</sub>-T</b>                          |             |             |             |
| E= -1200.580482<br>G= -1200.630589<br>ZPE= 0.238519 |             |             |             | E= -1051.487729<br>G= -1051.536213<br>ZPE= 0.252526 |             |             |             |
| N                                                   | 3.97157100  | 0.94642900  | 0.00052600  | N                                                   | 4.61727000  | 0.57604700  | 0.05583100  |
| C                                                   | 4.26286200  | -0.39267300 | 0.00012900  | C                                                   | 4.84016900  | -0.76896400 | -0.10415800 |
| N                                                   | 3.23511700  | -1.18362100 | -0.00042200 | N                                                   | 3.76803600  | -1.49320900 | -0.17614200 |
| C                                                   | 2.17983300  | -0.30862500 | -0.00036700 | C                                                   | 2.74352100  | -0.55394800 | -0.05654900 |
| C                                                   | 0.77814900  | -0.51695800 | -0.00071400 | C                                                   | 1.34403800  | -0.67207900 | -0.04785400 |
| N                                                   | 0.25493700  | -1.74539000 | -0.00134700 | N                                                   | 0.73752500  | -1.86514800 | -0.19190100 |
| H                                                   | -0.75221800 | -1.90716700 | -0.00082900 | H                                                   | -0.25942900 | -1.96505400 | -0.01490900 |
| H                                                   | 0.88446600  | -2.53363600 | -0.00102100 | H                                                   | 1.32058800  | -2.68701800 | -0.20495000 |
| N                                                   | -0.01334500 | 0.56794000  | -0.00051500 | N                                                   | 0.60303100  | 0.44313800  | 0.09144300  |
| C                                                   | 0.54918800  | 1.80666500  | 0.00000500  | C                                                   | 1.23144200  | 1.63913700  | 0.22367900  |
| N                                                   | 1.84141200  | 2.11298300  | 0.00040300  | N                                                   | 2.55363900  | 1.85921000  | 0.22933000  |
| C                                                   | 2.60563300  | 1.02310400  | 0.00019300  | C                                                   | 3.24526500  | 0.73170800  | 0.08922400  |
| H                                                   | 4.64570800  | 1.70065500  | 0.00092400  | H                                                   | 5.31751500  | 1.29813800  | 0.13088900  |
| N                                                   | -4.90412900 | 1.19058500  | -0.00033100 | N                                                   | -4.34273900 | 1.27692900  | -0.28818200 |
| C                                                   | -5.53471600 | -0.03607700 | 0.00004600  | C                                                   | -4.98697600 | 0.06816000  | -0.14710600 |
| H                                                   | -6.61882400 | 0.00096800  | 0.00007100  | H                                                   | -6.06918100 | 0.10674700  | -0.21483700 |
| C                                                   | -4.85301600 | -1.19920500 | 0.00034900  | C                                                   | -4.31599100 | -1.08143600 | 0.05949100  |
| C                                                   | -3.38974300 | -1.12826300 | 0.00025100  | C                                                   | -2.85295900 | -1.01316100 | 0.12574000  |
| O                                                   | -2.65901800 | -2.11276300 | 0.00044900  | O                                                   | -2.14570400 | -2.00045700 | 0.29255200  |
| N                                                   | -2.84586500 | 0.14740900  | -0.00006300 | N                                                   | -2.28861600 | 0.24702600  | -0.01457400 |
| H                                                   | -1.80517400 | 0.25023300  | -0.00020600 | H                                                   | -1.24254500 | 0.32098400  | 0.03437900  |
| C                                                   | -3.53688800 | 1.32763800  | -0.00041100 | C                                                   | -2.97156100 | 1.41870600  | -0.22487800 |
| O                                                   | -2.98798200 | 2.42455600  | -0.00076400 | O                                                   | -2.43271400 | 2.50904400  | -0.34880900 |
| H                                                   | -5.42978800 | 2.05352400  | -0.00055000 | H                                                   | -4.85626300 | 2.13320100  | -0.43955500 |
| C                                                   | -5.48994100 | -2.55422700 | 0.00072600  | N                                                   | 0.43416400  | 2.72768000  | 0.40261000  |
| H                                                   | -5.17760500 | -3.12485900 | -0.87819200 | H                                                   | -0.54222700 | 2.68300400  | 0.12921000  |
| H                                                   | -5.17751000 | -3.12442400 | 0.87989200  | H                                                   | 0.89918600  | 3.61872100  | 0.33296000  |
| H                                                   | -6.57896900 | -2.47232600 | 0.00076300  | C                                                   | -4.96147900 | -2.42315700 | 0.21746000  |
| O                                                   | -0.27023100 | 2.84300000  | 0.00023600  | H                                                   | -4.59325700 | -3.11702100 | -0.54324700 |
| H                                                   | -1.21881100 | 2.58677000  | -0.00012000 | H                                                   | -4.71352800 | -2.85651100 | 1.19051400  |
| N                                                   | 5.64655800  | -0.81683600 | 0.00037500  | H                                                   | -6.04770100 | -2.34513400 | 0.13116300  |
| O                                                   | 6.47332900  | 0.08779100  | 0.00094100  | O                                                   | 6.10797600  | -1.19679000 | -0.17012500 |
| O                                                   | 5.88099700  | -2.00439800 | 0.00009300  | H                                                   | 6.08139200  | -2.15594600 | -0.28976900 |
| <b>OH<sub>2</sub>AOH-T</b>                          |             |             |             | <b>OMeANH<sub>2</sub>-T</b>                         |             |             |             |
| E= -1071.410693<br>G= -1071.362864<br>ZPE= 0.240335 |             |             |             | E= -1090.741214<br>G= -1090.791602<br>ZPE= 0.280962 |             |             |             |
| N                                                   | -4.59885900 | 0.58407300  | -0.00362800 | N                                                   | 4.23098700  | 1.04336800  | -0.11061000 |
| C                                                   | -4.82734800 | -0.76839300 | -0.00102400 | C                                                   | 4.56141300  | -0.28519400 | 0.03633400  |
| N                                                   | -3.75738300 | -1.50170700 | 0.00205100  | N                                                   | 3.54497600  | -1.08795300 | 0.12564100  |
| C                                                   | -2.73038100 | -0.55946000 | 0.00165000  | C                                                   | 2.45254900  | -0.22561900 | 0.03243000  |
| C                                                   | -1.33249000 | -0.67982100 | 0.00382200  | C                                                   | 1.06666700  | -0.45021400 | 0.04553000  |
| N                                                   | -0.72758600 | -1.87967400 | 0.00793400  | N                                                   | 0.55551600  | -1.68757600 | 0.19511400  |
| H                                                   | 0.28484700  | -1.97848900 | 0.00432500  | H                                                   | -0.43015100 | -1.86484500 | 0.01644900  |
| H                                                   | -1.30753600 | -2.70350500 | 0.00533900  | H                                                   | 1.20257200  | -2.46016000 | 0.18518300  |
| N                                                   | -0.59349700 | 0.45027400  | 0.00245100  | N                                                   | 0.23950300  | 0.60507500  | -0.07716300 |
| C                                                   | -1.22388400 | 1.64804200  | -0.00082400 | C                                                   | 0.77325400  | 1.84578500  | -0.21481500 |
| N                                                   | -2.53301000 | 1.87188500  | -0.00309900 | N                                                   | 2.07436800  | 2.16644300  | -0.24113700 |
| C                                                   | -3.22718500 | 0.73650000  | -0.00176100 | C                                                   | 2.85309500  | 1.09480900  | -0.11726800 |
| H                                                   | -5.29479500 | 1.31467300  | -0.00542500 | H                                                   | 4.87373900  | 1.81512600  | -0.20147100 |
| N                                                   | 4.25595500  | 1.35509700  | 0.00084900  | N                                                   | -4.74923600 | 1.05126200  | 0.30475400  |
| C                                                   | 4.95921000  | 0.16939600  | -0.00123300 | C                                                   | -5.30204300 | -0.19922000 | 0.13991900  |
| H                                                   | 6.03929400  | 0.27067500  | -0.00197800 | H                                                   | -6.38471500 | -0.24124800 | 0.19708700  |
| C                                                   | 4.34607200  | -1.03081300 | -0.00225300 | C                                                   | -4.54630000 | -1.29348400 | -0.07527200 |
| C                                                   | 2.87971400  | -1.04652000 | -0.00107000 | C                                                   | -3.09161200 | -1.11677400 | -0.12681300 |

|                            |             |             |             |                  |             |             |             |
|----------------------------|-------------|-------------|-------------|------------------|-------------|-------------|-------------|
| O                          | 2.21482800  | -2.07588900 | -0.00182800 | O                | -2.31221900 | -2.04668400 | -0.30133800 |
| N                          | 2.25821600  | 0.19377800  | 0.00107700  | N                | -2.62251100 | 0.17911500  | 0.03671100  |
| H                          | 1.20874600  | 0.23614500  | 0.00172500  | H                | -1.58414200 | 0.33271500  | -0.00857500 |
| C                          | 2.88119000  | 1.41160000  | 0.00210200  | C                | -3.39164600 | 1.29413800  | 0.25619600  |
| O                          | 2.27553200  | 2.47725200  | 0.00400800  | O                | -2.93594900 | 2.41956200  | 0.39912400  |
| H                          | 4.72765500  | 2.24845800  | 0.00157200  | H                | -5.32547000 | 1.86567600  | 0.46170800  |
| C                          | 5.05969400  | -2.34700900 | -0.00440900 | N                | -0.10828000 | 2.87031800  | -0.37768000 |
| H                          | 4.78041100  | -2.93558600 | 0.87383400  | H                | -1.07370300 | 2.74769800  | -0.08976100 |
| H                          | 4.77925900  | -2.93340400 | -0.88374600 | H                | 0.28724600  | 3.79431800  | -0.30881800 |
| H                          | 6.14241500  | -2.20329500 | -0.00494200 | C                | -5.08837500 | -2.67720500 | -0.25808900 |
| O                          | -0.47093800 | 2.74270800  | -0.00204400 | H                | -4.78318900 | -3.08275500 | -1.22675800 |
| H                          | 0.48818800  | 2.54198000  | 0.00071500  | H                | -4.69017900 | -3.34902100 | 0.50743800  |
| O                          | -6.09540900 | -1.19562400 | -0.00199200 | H                | -6.17917500 | -2.67987100 | -0.19985600 |
| H                          | -6.07498400 | -2.16244100 | -0.00001200 | O                | 5.85710300  | -0.59956300 | 0.06913500  |
|                            |             |             |             | C                | 6.12344500  | -1.99444800 | 0.21427500  |
| <b><sup>OMc</sup>AOH-T</b> |             |             |             | <b>ANHLi-T</b>   |             |             |             |
| E= -1110.616520            |             |             |             | E= -983.267754   |             |             |             |
| G= -1110.666867            |             |             |             | G= -983.315038   |             |             |             |
| ZPE= 0.268761              |             |             |             | ZPE= 0.237068    |             |             |             |
| N                          | -4.21387000 | 1.05157800  | -0.00003800 | N                | -4.82284200 | -0.03175200 | 0.52785600  |
| C                          | -4.54835900 | -0.28304200 | -0.00014900 | C                | -4.96355400 | -1.28176800 | -0.05111800 |
| N                          | -3.53341200 | -1.09493700 | -0.00021300 | H                | -5.91117000 | -1.80236700 | -0.04678100 |
| C                          | -2.44018000 | -0.23126800 | -0.00006600 | N                | -3.85970300 | -1.72918000 | -0.57667700 |
| C                          | -1.05587900 | -0.45865300 | 0.00000100  | C                | -2.94279600 | -0.71702600 | -0.34431500 |
| N                          | -0.54602600 | -1.70243700 | -0.00032900 | C                | -1.55848900 | -0.62904400 | -0.56472000 |
| H                          | 0.45541700  | -1.88033300 | 0.00065900  | N                | -0.88652000 | -1.65429900 | -1.16760700 |
| H                          | -1.18982100 | -2.47744400 | 0.00034600  | H                | 0.05305900  | -1.82180400 | -0.82135100 |
| N                          | -0.23129500 | 0.61085300  | 0.00020800  | H                | -1.44332100 | -2.49407500 | -1.26168500 |
| C                          | -0.76843500 | 1.85336500  | 0.00023900  | N                | -0.90588600 | 0.47545500  | -0.18768400 |
| N                          | -2.05625600 | 2.17763600  | 0.00017200  | C                | -1.60434500 | 1.52225900  | 0.41861400  |
| C                          | -2.83667700 | 1.09892900  | 0.00004400  | N                | -2.91950600 | 1.46083500  | 0.75538400  |
| H                          | -4.85290300 | 1.83236900  | -0.00008800 | C                | -3.51351700 | 0.34814800  | 0.35006700  |
| N                          | 4.67276600  | 1.13488500  | -0.00102000 | H                | -5.53172600 | 0.50905000  | 0.99807300  |
| C                          | 5.28135700  | -0.10199000 | -0.00109500 | N                | 3.96496200  | 1.16113700  | -0.35665100 |
| H                          | 6.36597600  | -0.08560300 | -0.00192100 | C                | 4.54059500  | -0.02689600 | 0.04704000  |
| C                          | 4.57626200  | -1.25024000 | -0.00022600 | H                | 5.62459100  | -0.03332800 | 0.07996300  |
| C                          | 3.11338900  | -1.15152800 | 0.00076600  | C                | 3.79089300  | -1.09605400 | 0.36782500  |
| O                          | 2.37137200  | -2.12681900 | 0.00144700  | C                | 2.33146200  | -0.96647600 | 0.25913700  |
| N                          | 2.59003700  | 0.13311000  | 0.00092800  | O                | 1.56863500  | -1.89916200 | 0.46104900  |
| H                          | 1.54647800  | 0.25728200  | 0.00099000  | N                | 1.83500000  | 0.28681400  | -0.10468100 |
| C                          | 3.30646400  | 1.29856500  | -0.00001500 | H                | 0.73728900  | 0.40343200  | -0.14282800 |
| O                          | 2.78683300  | 2.40862700  | 0.00007200  | C                | 2.61125100  | 1.34639600  | -0.43149300 |
| H                          | 5.21259100  | 1.98883100  | -0.00161400 | O                | 2.16629300  | 2.45097200  | -0.79106000 |
| C                          | 5.18460600  | -2.61834500 | -0.00027900 | H                | 4.52736600  | 1.96445800  | -0.59880800 |
| H                          | 4.86017100  | -3.18160600 | 0.87897900  | N                | -0.90847700 | 2.63384100  | 0.65137700  |
| H                          | 4.85846500  | -3.18228700 | -0.87846500 | H                | -1.52019400 | 3.27690300  | 1.14546700  |
| H                          | 6.27523500  | -2.56018200 | -0.00135100 | C                | 4.34071400  | -2.41989500 | 0.79774000  |
| O                          | -5.84297500 | -0.59676300 | -0.00022300 | H                | 3.95501000  | -2.69107400 | 1.78429100  |
| C                          | -6.11306800 | -1.99906200 | -0.00047600 | H                | 4.02397800  | -3.20550900 | 0.10619700  |
| H                          | -5.68491900 | -2.46466900 | 0.89033800  | H                | 5.43200800  | -2.39633400 | 0.83575800  |
| H                          | -7.19775500 | -2.08725900 | -0.00075600 | Li               | 0.50040200  | 3.05945100  | -0.44002800 |
| H                          | -5.68446300 | -2.46444100 | -0.89118800 |                  |             |             |             |
| O                          | 0.06697900  | 2.88714100  | 0.00037300  | <b>AOLi-T</b>    |             |             |             |
| H                          | 1.00737400  | 2.61265400  | 0.00031800  | E= -1003.168181  |             |             |             |
|                            |             |             |             | G= -1003.215434  |             |             |             |
|                            |             |             |             | ZPE= 0.224575    |             |             |             |
| <b>AOLi-T</b>              |             |             |             | <b>NLiANH2-T</b> |             |             |             |
| E= -1003.168181            |             |             |             | E= -983.274565   |             |             |             |
| G= -1003.215434            |             |             |             | G= -983.321542   |             |             |             |
| ZPE= 0.224575              |             |             |             | ZPE= 0.237569    |             |             |             |
| N                          | 4.90016300  | 0.20218300  | -0.14041600 | N                | 4.89932600  | 0.40794700  | 0.07809500  |
| C                          | 5.08206100  | -1.11393400 | 0.24089600  | C                | 5.17213000  | -0.83776100 | -0.45224800 |
| H                          | 6.06948500  | -1.54386100 | 0.33642500  | H                | 6.18477600  | -1.15873900 | -0.65258000 |
| N                          | 3.96203500  | -1.74278600 | 0.46140800  | N                | 4.09528800  | -1.54164300 | -0.66997700 |
| C                          | 2.98983600  | -0.78810600 | 0.21666500  | C                | 3.06112600  | -0.71532900 | -0.27521000 |
| C                          | 1.58473600  | -0.83952900 | 0.23832500  | C                | 1.65252700  | -0.94487300 | -0.21059000 |
| N                          | 0.93376200  | -1.97486300 | 0.59218200  | N                | 1.07165700  | -2.09357800 | -0.50927500 |

|                                                     |             |             |             |                                                     |             |             |             |
|-----------------------------------------------------|-------------|-------------|-------------|-----------------------------------------------------|-------------|-------------|-------------|
| H                                                   | -0.01060000 | -2.09992900 | 0.24014000  | H                                                   | 1.77833700  | -2.73136600 | -0.86794400 |
| H                                                   | 1.51347100  | -2.79873900 | 0.66353700  | N                                                   | 0.89836900  | 0.11265800  | 0.24157000  |
| N                                                   | 0.89772800  | 0.26788000  | -0.07213600 | C                                                   | 1.50874300  | 1.25858600  | 0.63953800  |
| C                                                   | 1.56866300  | 1.43642600  | -0.41924000 | N                                                   | 2.81309800  | 1.52317100  | 0.67054900  |
| N                                                   | 2.90850000  | 1.55056300  | -0.48808200 | C                                                   | 3.53588500  | 0.49472700  | 0.19821300  |
| C                                                   | 3.54492600  | 0.42903800  | -0.16449600 | H                                                   | 5.56004100  | 1.12643500  | 0.33047900  |
| H                                                   | 5.61086600  | 0.87882400  | -0.37210700 | N                                                   | -3.65019300 | 1.49895400  | -0.75583000 |
| N                                                   | -3.89629300 | 1.25372300  | 0.48330300  | C                                                   | -4.50803000 | 0.49133000  | -0.40443600 |
| C                                                   | -4.55180100 | 0.07147100  | 0.21116500  | H                                                   | -5.56194700 | 0.68908700  | -0.57039600 |
| H                                                   | -5.63030200 | 0.09657300  | 0.32312700  | C                                                   | -4.06002700 | -0.67174400 | 0.11303400  |
| C                                                   | -3.87644700 | -1.02776200 | -0.16609600 | C                                                   | -2.61786900 | -0.81964800 | 0.26257700  |
| C                                                   | -2.41385700 | -0.93265800 | -0.26165700 | O                                                   | -2.12816600 | -1.87968200 | 0.69700000  |
| O                                                   | -1.72151100 | -1.89381000 | -0.56614800 | N                                                   | -1.81392200 | 0.22854600  | -0.09208700 |
| N                                                   | -1.83155100 | 0.30607600  | 0.01437100  | H                                                   | -0.71164800 | 0.14580100  | 0.04433300  |
| H                                                   | -0.71555900 | 0.34534300  | -0.03771700 | C                                                   | -2.27707500 | 1.42673600  | -0.58984300 |
| C                                                   | -2.53866100 | 1.40347700  | 0.37451000  | O                                                   | -1.55764800 | 2.37173900  | -0.86610100 |
| O                                                   | -2.04442400 | 2.52197600  | 0.60688100  | H                                                   | -3.98884300 | 2.37764800  | -1.12269300 |
| H                                                   | -4.40113100 | 2.08670900  | 0.75044400  | N                                                   | 0.67569300  | 2.25910200  | 1.10593100  |
| C                                                   | -4.50843200 | -2.34818800 | -0.47642000 | H                                                   | -0.16616400 | 2.38937800  | 0.55409700  |
| H                                                   | -4.25984200 | -2.65871200 | -1.49490600 | H                                                   | 1.18638900  | 3.12234300  | 1.23420600  |
| H                                                   | -4.12335100 | -3.12125600 | 0.19421000  | C                                                   | -4.94110000 | -1.81472600 | 0.51454300  |
| H                                                   | -5.59459800 | -2.29507900 | -0.37408000 | H                                                   | -4.69294400 | -2.71308500 | -0.05746000 |
| O                                                   | 0.84062300  | 2.45248000  | -0.67566400 | H                                                   | -4.80057800 | -2.05723100 | 1.57146400  |
| Li                                                  | -0.48749900 | 3.22804100  | 0.04468400  | H                                                   | -5.99229600 | -1.57034000 | 0.34621600  |
|                                                     |             |             |             | Li                                                  | -0.46389200 | -2.50875600 | 0.42893000  |
| <b>NLiAOH-T</b>                                     |             |             |             | <b>ANHLi-T-2W</b>                                   |             |             |             |
| E= -1003.149767<br>G= -1003.196877<br>ZPE= 0.224217 |             |             |             | E= -1136.062689<br>G= -1136.115877<br>ZPE= 0.288820 |             |             |             |
| N                                                   | 4.90542200  | 0.37716400  | 0.13084500  | N                                                   | 4.60587500  | -0.59167000 | -1.19175600 |
| C                                                   | 5.16959400  | -0.90365500 | -0.30906600 | C                                                   | 4.87443600  | -1.75758600 | -0.49355500 |
| H                                                   | 6.18127300  | -1.26082600 | -0.44105800 | H                                                   | 5.77253100  | -2.33073800 | -0.67805300 |
| N                                                   | 4.08604300  | -1.59625700 | -0.53373200 | N                                                   | 3.95072800  | -2.06050600 | 0.37160400  |
| C                                                   | 3.05728400  | -0.72342000 | -0.23764100 | C                                                   | 3.02492800  | -1.03710100 | 0.24723500  |
| C                                                   | 1.64343600  | -0.91836300 | -0.22160900 | C                                                   | 1.77476900  | -0.81156400 | 0.84168200  |
| N                                                   | 1.05926700  | -2.07343400 | -0.48924300 | N                                                   | 1.25896500  | -1.65910200 | 1.77881700  |
| H                                                   | 1.78184300  | -2.72828100 | -0.78283400 | H                                                   | 0.24952000  | -1.76016300 | 1.73759100  |
| N                                                   | 0.89993400  | 0.18298700  | 0.13802500  | H                                                   | 1.75725500  | -2.53667900 | 1.85175300  |
| C                                                   | 1.52938400  | 1.33917200  | 0.47782700  | N                                                   | 1.07723600  | 0.27351100  | 0.48957200  |
| N                                                   | 2.82601500  | 1.57604200  | 0.55264700  | C                                                   | 1.57098000  | 1.15460600  | -0.47389400 |
| C                                                   | 3.54108500  | 0.50158700  | 0.18192800  | N                                                   | 2.74789700  | 0.96745300  | -1.12965900 |
| H                                                   | 5.57077900  | 1.09701400  | 0.36783400  | C                                                   | 3.40422300  | -0.11156700 | -0.72825400 |
| N                                                   | -3.64165200 | 1.54519100  | -0.59556200 | H                                                   | 5.16390200  | -0.16857400 | -1.91696900 |
| C                                                   | -4.50749100 | 0.51955000  | -0.32247100 | N                                                   | -4.01596100 | 0.52359500  | -0.78342300 |
| H                                                   | -5.55994600 | 0.73741100  | -0.47062100 | C                                                   | -4.42910900 | -0.78903400 | -0.69365400 |
| C                                                   | -4.06528400 | -0.68260500 | 0.10188600  | H                                                   | -5.46812700 | -0.96761700 | -0.94944400 |
| C                                                   | -2.62377200 | -0.85143000 | 0.24016800  | C                                                   | -3.59857500 | -1.77491100 | -0.30532600 |
| O                                                   | -2.14606600 | -1.94522500 | 0.59588100  | C                                                   | -2.21794900 | -1.41019500 | 0.03025000  |
| N                                                   | -1.81114900 | 0.21415600  | -0.03551200 | O                                                   | -1.39585100 | -2.19942600 | 0.46830000  |
| H                                                   | -0.68783900 | 0.13764500  | 0.05265500  | N                                                   | -1.87184500 | -0.07654300 | -0.18567200 |
| C                                                   | -2.27406200 | 1.44239800  | -0.44039700 | H                                                   | -0.88725100 | 0.16292700  | 0.01376500  |
| O                                                   | -1.54533600 | 2.40236500  | -0.65333800 | C                                                   | -2.73698300 | 0.93653400  | -0.49234300 |
| H                                                   | -3.97245400 | 2.45474400  | -0.88746000 | O                                                   | -2.43798100 | 2.12745900  | -0.52029300 |
| C                                                   | -4.95322400 | -1.84752300 | 0.41515900  | H                                                   | -4.66308000 | 1.26364500  | -1.01489400 |
| H                                                   | -4.70782300 | -2.70210700 | -0.22143900 | N                                                   | 0.79997100  | 2.20882500  | -0.73055800 |
| H                                                   | -4.81674100 | -2.16868500 | 1.45142800  | H                                                   | 1.20765800  | 2.68696400  | -1.53208700 |
| H                                                   | -6.00268900 | -1.58611400 | 0.26296900  | C                                                   | -3.99222300 | -3.21252900 | -0.16694100 |
| O                                                   | 0.75138100  | 2.37900600  | 0.80666800  | H                                                   | -3.36757100 | -3.84339100 | -0.80530300 |
| H                                                   | -0.08968700 | 2.35733600  | 0.30898200  | H                                                   | -3.84101500 | -3.55196000 | 0.86151300  |
| Li                                                  | -0.51514100 | -2.62083500 | 0.29295200  | H                                                   | -5.03989000 | -3.35860600 | -0.43916100 |
|                                                     |             |             |             | Li                                                  | -0.81717600 | 2.80757800  | 0.24528400  |
|                                                     |             |             |             | O                                                   | -0.67027200 | 1.74242600  | 1.88172200  |
|                                                     |             |             |             | H                                                   | -0.48762200 | 1.97748400  | 2.79484600  |
|                                                     |             |             |             | O                                                   | 0.11302700  | 4.54437500  | 0.56651000  |
|                                                     |             |             |             | H                                                   | 0.35248600  | 4.96634800  | 1.39608800  |
|                                                     |             |             |             | H                                                   | 0.05802800  | 1.13028800  | 1.55800300  |
|                                                     |             |             |             | H                                                   | 0.85629700  | 3.96981000  | 0.29291400  |
| <b>AOLi-T-2W</b>                                    |             |             |             | <b>NLiANH2-T-2W</b>                                 |             |             |             |
| E= -1155.965923<br>G= -1156.019548                  |             |             |             | E= -1136.070900<br>G= -1136.123687                  |             |             |             |

| ZPE= 0.276502     |             |             |             | ZPE= 0.290053         |             |             |             |
|-------------------|-------------|-------------|-------------|-----------------------|-------------|-------------|-------------|
| N                 | 4.82128200  | 0.33025300  | 0.84961400  | N                     | 4.73598500  | -0.75760100 | -0.84728800 |
| C                 | 5.06675000  | 1.60932900  | 0.38350500  | C                     | 4.77598500  | 0.34347300  | -1.67834600 |
| H                 | 6.02970800  | 2.08296700  | 0.51466300  | H                     | 5.64873400  | 0.57557600  | -2.27222700 |
| N                 | 4.03712200  | 2.14587900  | -0.20630400 | N                     | 3.66929400  | 1.03595200  | -1.65103800 |
| C                 | 3.05953700  | 1.16782600  | -0.12909600 | C                     | 2.86047700  | 0.35497100  | -0.76320700 |
| C                 | 1.71859600  | 1.13071300  | -0.54535500 | C                     | 1.54152100  | 0.64144500  | -0.28111300 |
| N                 | 1.13937800  | 2.16713400  | -1.20289800 | N                     | 0.80450000  | 1.67648700  | -0.60744900 |
| H                 | 0.13378300  | 2.26024100  | -1.08899400 | H                     | 1.30243700  | 2.21668400  | -1.31284800 |
| H                 | 1.67134600  | 3.02625300  | -1.20360500 | N                     | 1.04692600  | -0.26778000 | 0.63621600  |
| N                 | 1.00613900  | 0.01996900  | -0.30922900 | C                     | 1.78888800  | -1.33925500 | 1.01589700  |
| C                 | 1.57521000  | -1.05886800 | 0.36950800  | N                     | 3.02098200  | -1.65375500 | 0.63567200  |
| N                 | 2.85218600  | -1.08848900 | 0.80615300  | C                     | 3.50252000  | -0.75753900 | -0.24928400 |
| C                 | 3.51963700  | 0.02774800  | 0.53032800  | H                     | 5.46207400  | -1.44083900 | -0.69693000 |
| H                 | 5.45503000  | -0.27282900 | 1.35111400  | N                     | -3.36379200 | -2.18465100 | -0.51062500 |
| N                 | -4.02571800 | -0.82117400 | 0.51642800  | C                     | -4.26699300 | -1.21817500 | -0.88499600 |
| C                 | -4.57977500 | 0.44019800  | 0.53579000  | H                     | -5.21792400 | -1.58578900 | -1.25586400 |
| H                 | -5.64698200 | 0.47676500  | 0.72629800  | C                     | -3.98911300 | 0.09720600  | -0.78810600 |
| C                 | -3.84187200 | 1.54600900  | 0.32394600  | C                     | -2.67278800 | 0.47748200  | -0.27543200 |
| C                 | -2.40883200 | 1.36956000  | 0.06889000  | O                     | -2.35260300 | 1.65489000  | -0.11300000 |
| O                 | -1.65478700 | 2.29747100  | -0.18695300 | N                     | -1.80524800 | -0.55475300 | 0.02917600  |
| N                 | -1.92754500 | 0.06373800  | 0.13654700  | H                     | -0.81472200 | -0.34968700 | 0.29481000  |
| C                 | -2.69059200 | -1.06078800 | 0.28763800  | C                     | -2.10574800 | -1.89998600 | -0.01713700 |
| O                 | -2.26383400 | -2.21083400 | 0.23446400  | O                     | -1.34171400 | -2.77425700 | 0.35212100  |
| H                 | -4.59410100 | -1.64777900 | 0.63471500  | H                     | -3.59495800 | -3.16707400 | -0.55479600 |
| C                 | -4.38497000 | 2.94096000  | 0.31422000  | N                     | 1.18418100  | -2.17032400 | 1.94356000  |
| H                 | -3.87811700 | 3.55416300  | 1.06430300  | H                     | 0.20898400  | -2.35369600 | 1.72847600  |
| H                 | -4.20744300 | 3.41310500  | -0.65596200 | H                     | 1.71344400  | -3.02327300 | 2.06891000  |
| H                 | -5.45773300 | 2.94330100  | 0.51937700  | C                     | -4.93691900 | 1.19327900  | -1.16665100 |
| O                 | 0.81021000  | -2.05681200 | 0.55244700  | H                     | -5.15491900 | 1.82848300  | -0.30357600 |
| Li                | -0.57757600 | -2.74941600 | -0.46725200 | H                     | -4.49454500 | 1.83585000  | -1.93282700 |
| H                 | -0.89996100 | -0.04350900 | 0.00191400  | H                     | -5.87399700 | 0.78167200  | -1.54806100 |
| O                 | 0.30446400  | -4.49006000 | -0.12885000 | Li                    | -0.69134100 | 2.35377900  | 0.44961500  |
| H                 | 0.78777400  | -5.14381300 | -0.63960100 | O                     | -0.24900600 | 1.45473500  | 2.21222100  |
| O                 | -0.45707300 | -1.57486200 | -2.03851900 | H                     | -0.77163300 | 1.07726700  | 2.92574600  |
| H                 | -0.16982400 | -1.71734700 | -2.94427600 | O                     | -0.02153200 | 4.02197300  | 1.29637200  |
| H                 | 0.95226700  | -3.92198700 | 0.33574300  | H                     | 0.27872200  | 3.45996800  | 2.02832200  |
| H                 | 0.12311500  | -0.87781200 | -1.64305000 | H                     | 0.28775200  | 0.70788700  | 1.80339700  |
| H                 |             |             |             | H                     | 0.77664600  | 4.29446300  | 0.82959300  |
| <b>NLiOH-T-2W</b> |             |             |             | <b>AOLi-T-2W-COOH</b> |             |             |             |
| E= -1155.944665   |             |             |             | E= -1344.470035       |             |             |             |
| G= -1155.998045   |             |             |             | G= -1344.527785       |             |             |             |
| ZPE= 0.276987     |             |             |             | ZPE= 0.291733         |             |             |             |
| N                 | -4.84473200 | -0.70267700 | -0.70558200 | N                     | 3.98782900  | 0.66709700  | -0.60756700 |
| C                 | -4.93923300 | 0.46993900  | -1.42520700 | C                     | 4.43572800  | -0.54726600 | -0.11153200 |
| H                 | -5.85667600 | 0.76244500  | -1.91631600 | N                     | 3.48360800  | -1.25867600 | 0.43547300  |
| N                 | -3.82315200 | 1.14871900  | -1.43385500 | C                     | 2.36710000  | -0.47885500 | 0.29870000  |
| C                 | -2.95110600 | 0.38103700  | -0.68855300 | C                     | 1.01749300  | -0.68844300 | 0.65895200  |
| C                 | -1.59277900 | 0.61259900  | -0.29684300 | N                     | 0.61775100  | -1.81371600 | 1.29055600  |
| N                 | -0.87604500 | 1.67344800  | -0.58148700 | H                     | -0.35511400 | -2.08341300 | 1.17076100  |
| H                 | -1.43025100 | 2.27985700  | -1.18387100 | H                     | 1.29978000  | -2.55743000 | 1.34034800  |
| N                 | -1.03679200 | -0.38578100 | 0.48725400  | N                     | 0.13271800  | 0.27483000  | 0.38538900  |
| C                 | -1.76379700 | -1.48610400 | 0.81029100  | C                     | 0.52763700  | 1.43744100  | -0.28825000 |
| N                 | -3.02098300 | -1.75171700 | 0.52289200  | N                     | 1.79604300  | 1.69989800  | -0.67227200 |
| C                 | -3.56347400 | -0.76867400 | -0.22422700 | C                     | 2.64553100  | 0.72942000  | -0.35562500 |
| H                 | -5.56339500 | -1.39455900 | -0.55729500 | H                     | 4.54839300  | 1.36204400  | -1.07917500 |
| N                 | 3.46250800  | -2.11826200 | -0.39634400 | N                     | -4.92821300 | 0.20957500  | -0.63397800 |
| C                 | 4.35597300  | -1.14255800 | -0.77396500 | C                     | -5.24260100 | -1.13154800 | -0.67510500 |
| H                 | 5.33490100  | -1.49817200 | -1.07732100 | H                     | -6.27239100 | -1.36049400 | -0.92796300 |
| C                 | 4.03594000  | 0.16678000  | -0.75773800 | C                     | -4.33099000 | -2.08628000 | -0.40997300 |
| C                 | 2.68624500  | 0.53057300  | -0.32660200 | C                     | -2.97166600 | -1.65351400 | -0.07206400 |
| O                 | 2.32486700  | 1.70185100  | -0.21941300 | O                     | -2.07801900 | -2.42847100 | 0.23829400  |
| N                 | 1.82980800  | -0.51503800 | -0.03416100 | N                     | -2.73137100 | -0.28212900 | -0.12497700 |
| H                 | 0.81759600  | -0.33703300 | 0.16787000  | C                     | -3.67321300 | 0.68582700  | -0.33654000 |
| C                 | 2.17479400  | -1.84541400 | 0.00953500  | O                     | -3.46158900 | 1.89415100  | -0.27740900 |
| O                 | 1.41517100  | -2.72517200 | 0.38593300  | H                     | -5.62753900 | 0.91935600  | -0.79998400 |
| H                 | 3.72431800  | -3.09410300 | -0.37462300 | C                     | -4.61255100 | -3.55658300 | -0.42300800 |
| C                 | 4.97070800  | 1.27209000  | -1.14206600 | H                     | -3.95584700 | -4.06544000 | -1.13404200 |
| C                 | 4.55768500  | 1.85256600  | -1.97169500 | H                     | -4.41649600 | -3.99253400 | 0.56050900  |
| H                 | 5.11199300  | 1.96361400  | -0.30696600 | H                     | -5.65166700 | -3.75203700 | -0.69686600 |
| H                 | 5.94263000  | 0.87274600  | -1.43994300 | O                     | -0.39640100 | 2.27316400  | -0.51641200 |

|                                                     |             |             |             |                                                     |             |             |             |
|-----------------------------------------------------|-------------|-------------|-------------|-----------------------------------------------------|-------------|-------------|-------------|
| O                                                   | -1.12739600 | -2.41692800 | 1.54051900  | Li                                                  | -1.92241600 | 2.75148700  | 0.43109700  |
| H                                                   | -0.18373700 | -2.42497700 | 1.29667100  | H                                                   | -1.74687900 | 0.00864400  | 0.05243900  |
| Li                                                  | 0.65750900  | 2.32810600  | 0.42207100  | O                                                   | -1.35317800 | 4.60085100  | 0.05654200  |
| O                                                   | 0.28397900  | 1.30106900  | 2.14596000  | H                                                   | -1.04416700 | 5.37872100  | 0.52664500  |
| H                                                   | 0.83290500  | 0.90274800  | 2.82806200  | O                                                   | -1.62553100 | 1.66492700  | 2.05776900  |
| O                                                   | 0.06165200  | 3.92732600  | 1.42887500  | H                                                   | -1.41714600 | 1.86958600  | 2.97321900  |
| H                                                   | -0.26506500 | 3.32649800  | 2.11673200  | H                                                   | -0.58578700 | 4.17001900  | -0.36823200 |
| H                                                   | -0.25954400 | 0.57073200  | 1.73488200  | H                                                   | -0.92382700 | 1.06468600  | 1.71454000  |
| H                                                   | -0.71598400 | 4.34570400  | 1.04384000  | C                                                   | 5.84648700  | -0.95811800 | -0.21250200 |
|                                                     |             |             |             | O                                                   | 6.31739600  | -1.99002300 | 0.18867100  |
|                                                     |             |             |             | O                                                   | 6.57996400  | -0.00012000 | -0.83434900 |
|                                                     |             |             |             | H                                                   | 7.49251600  | -0.32265400 | -0.87701800 |
| <b>AOLi-T-2W-NO2</b>                                |             |             |             | <b>AOLi-T-2W-OH</b>                                 |             |             |             |
| E= -1360.392652<br>G= -1360.450273<br>ZPE= 0.279283 |             |             |             | E= -1231.171134<br>G= -1231.226491<br>ZPE= 0.280788 |             |             |             |
| N                                                   | 4.02981400  | 0.69073200  | -0.60226000 | N                                                   | 4.52090500  | 0.19170200  | -0.79427000 |
| C                                                   | 4.44679300  | -0.53144400 | -0.13401000 | C                                                   | 4.87646900  | -1.02758700 | -0.27193800 |
| N                                                   | 3.51439300  | -1.26813900 | 0.38775100  | N                                                   | 3.92754800  | -1.65574500 | 0.34404500  |
| C                                                   | 2.39898400  | -0.48272100 | 0.26535100  | C                                                   | 2.84217000  | -0.78150700 | 0.22734300  |
| C                                                   | 1.04588000  | -0.70170700 | 0.61615100  | C                                                   | 1.51004800  | -0.86251900 | 0.63732200  |
| N                                                   | 0.64414200  | -1.84158600 | 1.21282000  | N                                                   | 1.02379300  | -1.92244300 | 1.34293700  |
| H                                                   | -0.33467000 | -2.09833600 | 1.10995300  | H                                                   | 0.03974100  | -2.12643300 | 1.19003300  |
| H                                                   | 1.32112000  | -2.58971900 | 1.25783100  | H                                                   | 1.63304900  | -2.72842900 | 1.36572600  |
| N                                                   | 0.16591100  | 0.27073600  | 0.36485900  | N                                                   | 0.68701800  | 0.16330900  | 0.35571700  |
| C                                                   | 0.56410800  | 1.44973800  | -0.27820300 | C                                                   | 1.14085800  | 1.26006900  | -0.36570400 |
| N                                                   | 1.83820400  | 1.72155300  | -0.65005700 | N                                                   | 2.41369000  | 1.39595500  | -0.80744600 |
| C                                                   | 2.68178000  | 0.74530200  | -0.35569700 | C                                                   | 3.18451400  | 0.36987500  | -0.48238900 |
| H                                                   | 4.61436600  | 1.38400900  | -1.04818200 | H                                                   | 5.10943900  | 0.81615900  | -1.32414900 |
| N                                                   | -4.91563000 | 0.21944300  | -0.63629300 | N                                                   | -4.37632500 | 0.47937900  | -0.51832300 |
| C                                                   | -5.24006000 | -1.12001100 | -0.65349100 | C                                                   | -4.78765700 | -0.83423300 | -0.57805500 |
| H                                                   | -6.27343300 | -1.34510800 | -0.89468600 | H                                                   | -5.83900600 | -0.98340000 | -0.80017400 |
| C                                                   | -4.33359200 | -2.07774400 | -0.38063800 | C                                                   | -3.93820200 | -1.85696400 | -0.36631600 |
| C                                                   | -2.96859000 | -1.65044000 | -0.06179000 | C                                                   | -2.54020000 | -1.53021200 | -0.06691000 |
| O                                                   | -2.07680500 | -2.42672400 | 0.25165900  | O                                                   | -1.69494100 | -2.37560100 | 0.19015100  |
| N                                                   | -2.71923800 | -0.28192400 | -0.13800500 | N                                                   | -2.20414600 | -0.17825200 | -0.09223100 |
| C                                                   | -3.65582800 | 0.69054300  | -0.35476900 | C                                                   | -3.08031900 | 0.85826700  | -0.25501100 |
| O                                                   | -3.43195000 | 1.89736000  | -0.31323100 | O                                                   | -2.78272200 | 2.04752400  | -0.18249900 |
| H                                                   | -5.61183500 | 0.93142500  | -0.80661700 | H                                                   | -5.02623400 | 1.24154100  | -0.64780400 |
| C                                                   | -4.62680200 | -3.54578900 | -0.36744800 | C                                                   | -4.32348100 | -3.30291100 | -0.40292100 |
| H                                                   | -3.97825200 | -4.07173400 | -1.07346200 | H                                                   | -3.72886400 | -3.83826400 | -1.14832900 |
| H                                                   | -4.42886300 | -3.96670200 | 0.62222300  | H                                                   | -4.12499500 | -3.77616500 | 0.56274300  |
| H                                                   | -5.66886700 | -3.73750600 | -0.63222700 | H                                                   | -5.38265800 | -3.41842600 | -0.64382700 |
| O                                                   | -0.35251000 | 2.29162700  | -0.49196800 | O                                                   | 0.28522900  | 2.17297700  | -0.59066900 |
| Li                                                  | -1.90250900 | 2.75054800  | 0.42572800  | Li                                                  | -1.14262400 | 2.77550400  | 0.43198200  |
| H                                                   | -1.73476600 | 0.00668900  | 0.03084500  | H                                                   | -1.19391500 | 0.03505100  | 0.06181700  |
| O                                                   | -1.35490300 | 4.60115500  | 0.08513700  | O                                                   | -0.45309400 | 4.57338400  | -0.01328500 |
| H                                                   | -1.12164100 | 5.43225500  | 0.50455100  | H                                                   | -0.04366000 | 5.30948800  | 0.44753000  |
| O                                                   | -1.62702800 | 1.64756300  | 2.04460000  | O                                                   | -0.86108700 | 1.69930500  | 2.06585400  |
| H                                                   | -1.43646000 | 1.86162800  | 2.96195800  | H                                                   | -0.55209800 | 1.91066300  | 2.95062700  |
| H                                                   | -0.55895500 | 4.22306800  | -0.33296900 | H                                                   | 0.24845700  | 4.05695800  | -0.45897900 |
| H                                                   | -0.91541500 | 1.05305800  | 1.71860400  | H                                                   | -0.24115200 | 1.03139300  | 1.68287600  |
| O                                                   | 6.18218600  | -1.98612100 | 0.15932500  | O                                                   | 6.13976200  | -1.44468900 | -0.44216600 |
| O                                                   | 6.56293600  | -0.05854700 | -0.77073100 | H                                                   | 6.21199500  | -2.31084600 | -0.01864300 |
| N                                                   | 5.83437100  | -0.89931800 | -0.25110900 |                                                     |             |             |             |
| <b>AOLi-T-2W-OMe</b>                                |             |             |             |                                                     |             |             |             |
| E= -1270.423866<br>G= -1270.480434<br>ZPE= 0.309837 |             |             |             |                                                     |             |             |             |
| N                                                   | 4.16801700  | 0.74467000  | -0.82648100 |                                                     |             |             |             |
| C                                                   | 4.64990600  | -0.43812700 | -0.31114400 |                                                     |             |             |             |
| N                                                   | 3.77029600  | -1.15535000 | 0.31576600  |                                                     |             |             |             |
| C                                                   | 2.60599000  | -0.38807300 | 0.21270400  |                                                     |             |             |             |
| C                                                   | 1.29417400  | -0.59715300 | 0.64067600  |                                                     |             |             |             |
| N                                                   | 0.92497300  | -1.69799400 | 1.35582500  |                                                     |             |             |             |
| H                                                   | -0.03411400 | -2.00304300 | 1.21226900  |                                                     |             |             |             |
| H                                                   | 1.61402300  | -2.43721500 | 1.37078800  |                                                     |             |             |             |
| N                                                   | 0.36972400  | 0.34178300  | 0.36820800  |                                                     |             |             |             |
| C                                                   | 0.70585100  | 1.47514700  | -0.36054300 |                                                     |             |             |             |



|    |             |             |             |
|----|-------------|-------------|-------------|
| N  | 1.95426500  | 1.73643900  | -0.81455900 |
| C  | 2.82657000  | 0.79114800  | -0.49958500 |
| H  | 4.68706600  | 1.42235600  | -1.36325500 |
| N  | -4.68731900 | 0.11910600  | -0.54410400 |
| C  | -4.95967300 | -1.23020400 | -0.59991900 |
| H  | -5.98678600 | -1.48811700 | -0.83532700 |
| C  | -4.01242400 | -2.15827900 | -0.36904300 |
| C  | -2.66011300 | -1.68673500 | -0.05238500 |
| O  | -1.73633100 | -2.43812900 | 0.22486600  |
| N  | -2.46498900 | -0.30726200 | -0.08501900 |
| C  | -3.44105100 | 0.63184500  | -0.26735100 |
| O  | -3.26999400 | 1.84601100  | -0.19982800 |
| H  | -5.41121700 | 0.80882500  | -0.68674600 |
| C  | -4.24691900 | -3.63656200 | -0.39982300 |
| H  | -3.58793800 | -4.11303000 | -1.13091300 |
| H  | -4.01779900 | -4.08075500 | 0.57290200  |
| H  | -5.28445000 | -3.86140400 | -0.65698400 |
| O  | -0.23903500 | 2.29721400  | -0.58121700 |
| Li | -1.72803100 | 2.75026800  | 0.43151600  |
| H  | -1.48368200 | 0.01112500  | 0.07747700  |
| O  | -1.19613500 | 4.61277300  | 0.02201200  |
| H  | -0.84428300 | 5.36442500  | 0.50467300  |
| O  | -1.34349500 | 1.69919100  | 2.06667900  |
| H  | -1.07070800 | 1.93465800  | 2.95726400  |
| H  | -0.45319100 | 4.15970000  | -0.42645600 |
| H  | -0.64668500 | 1.11049900  | 1.68422200  |
| O  | 5.94179300  | -0.71536200 | -0.50469100 |
| C  | 6.36572900  | -1.95901400 | 0.05076300  |
| H  | 7.42742500  | -2.03541400 | -0.17788300 |
| H  | 6.19843000  | -1.96697600 | 1.13069200  |
| H  | 5.81054600  | -2.78371600 | -0.40338600 |

Table S1: The M06-2X-D3 level of theory calculated energies and free energies for representative system

| Name                      | $\Delta E_{M062X}$ | $\Delta E_{M062X-D3}$ | $\Delta G_{M062X}$ | $\Delta G_{M062X-D3}$ |
|---------------------------|--------------------|-----------------------|--------------------|-----------------------|
| A-T                       | -16.4              | -16.9                 | -3.3               | -3.9                  |
| ANH <sub>2</sub> -T       | -19.3              | -19.9                 | -5.3               | -5.9                  |
| AOH-T                     | -20.3              | -20.8                 | -7.0               | -7.6                  |
| ANHLi-T                   | -25.1              | -25.7                 | -13.0              | -13.7                 |
| AoLi-T                    | -28.6              | -29.2                 | -16.4              | -17.0                 |
| ANHLi-T-2W                | -60.7              | -61.9                 | -24.9              | -26.1                 |
| AoLi-T-2W                 | -66.0              | -67.2                 | -30.3              | -31.1                 |
| AoLi-T-2W-COOH            | -64.9              | -66.1                 | -29.0              | -30.1                 |
| AoLi-T-2W-NO <sub>2</sub> | -67.0              | -68.1                 | -30.0              | -31.2                 |

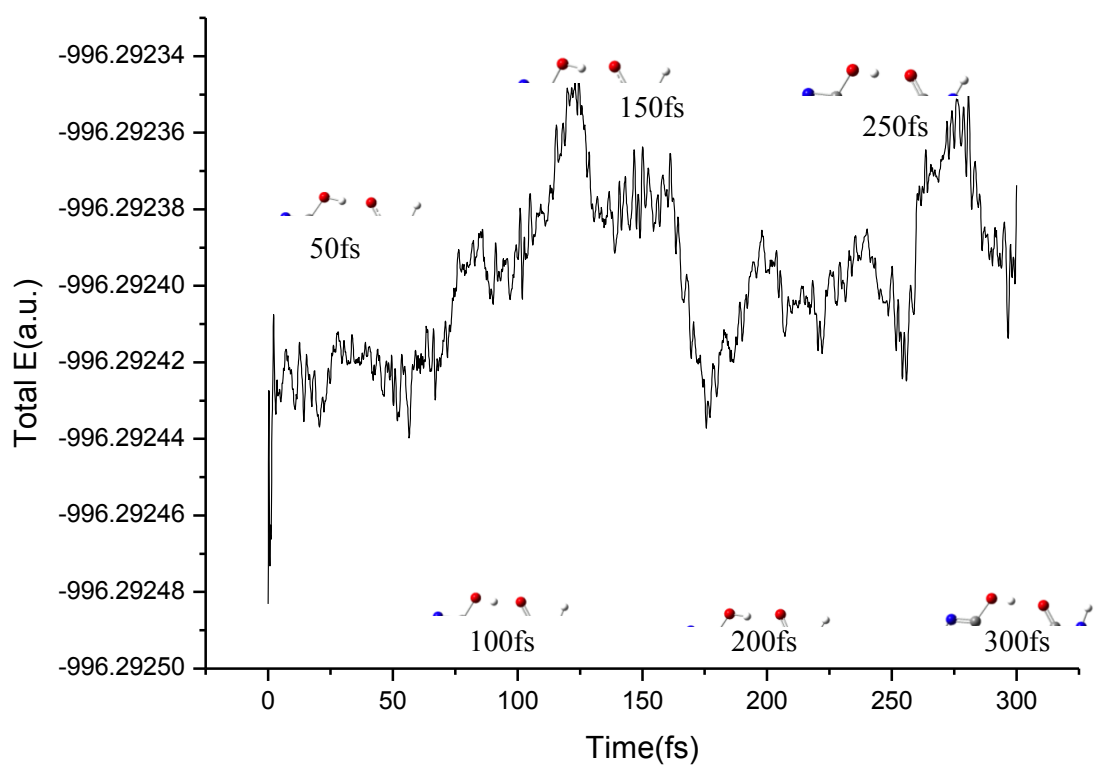

**Figure S1:** Trajectory analysis of AOH-T mispair with time.

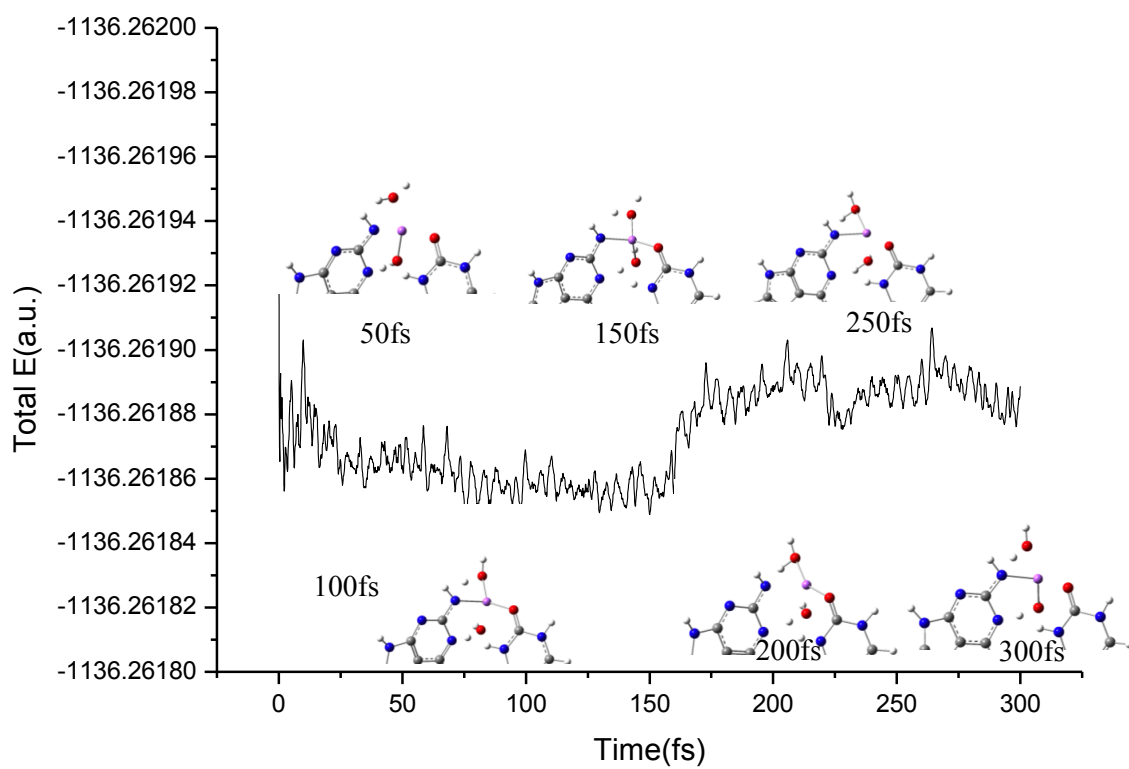

**Figure S2:** Trajectory analysis of ANHLi-T mispair with time.

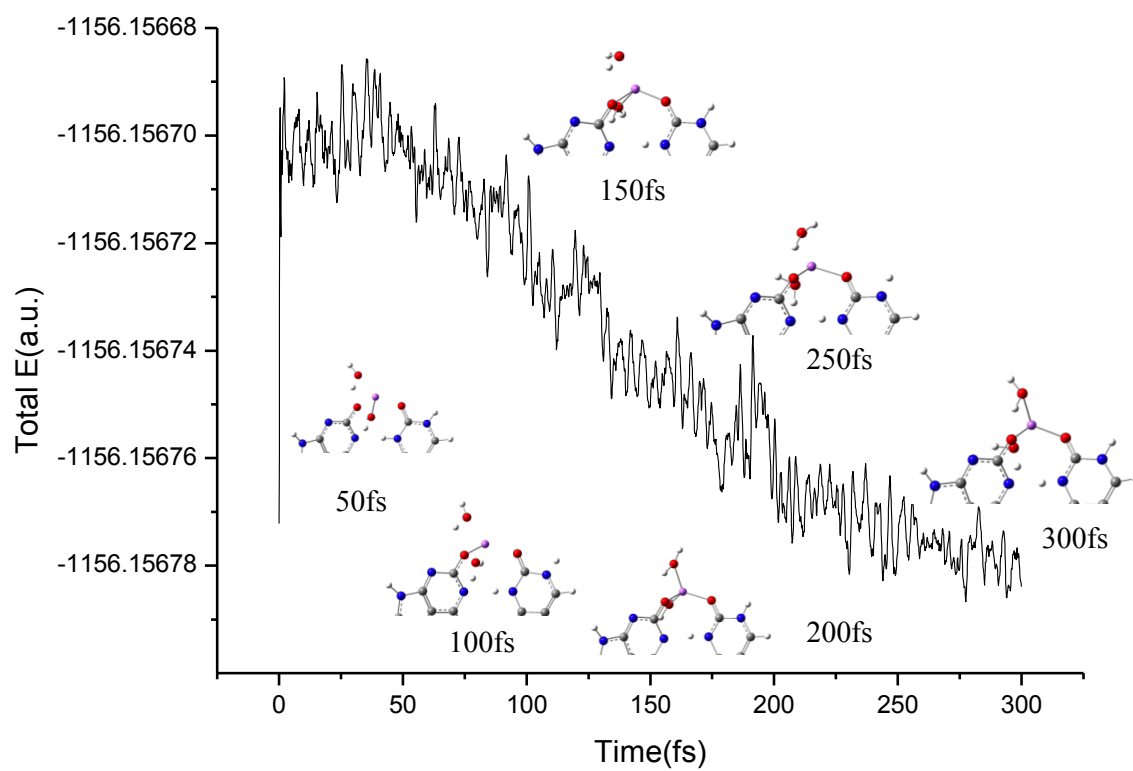

**Figure S3:** Trajectory analysis of AOLi-T mispair with time.

Table S2: Solvation free energies of representative system. Energy values are given in kcal/mol.

| Name                                          | $\Delta G_{\text{Solvation}}$ |
|-----------------------------------------------|-------------------------------|
| A-T                                           | 2.82                          |
| ANH <sub>2</sub> -T                           | 2.22                          |
| AOH-T                                         | -0.25                         |
| <sup>Br</sup> ANH <sub>2</sub> -T             | 2.07                          |
| <sup>Br</sup> AOH-T                           | -0.89                         |
| <sup>NO<sub>2</sub></sup> ANH <sub>2</sub> -T | 0.12                          |
| <sup>NO<sub>2</sub></sup> AOH-T               | -0.99                         |

Table S3:H-Bond Energy Calculations using three different methods\*.

|                     |                           | $E_{\text{HB}}=0.33*\sqrt{(\Delta v-40)}$ | $E_{\text{HB}}=-2.03+225*\rho$ | $E_{\text{HB}}=1/2(V(r))$ |
|---------------------|---------------------------|-------------------------------------------|--------------------------------|---------------------------|
| A-T                 | N---H-N                   | 8.6                                       | 8.6                            | 10.68                     |
|                     | N-H---O                   | 4.0                                       | 3.5                            | 6.10                      |
|                     | C-H---O                   | -                                         | -                              | 1.23                      |
| ANH <sub>2</sub> -T | N---H-N                   | 8.0                                       | 5.9                            | 7.23                      |
|                     | N-H---O(CH <sub>3</sub> ) | 3.7                                       | 4.1                            | 6.79                      |
|                     | N-H---O                   | 3.0                                       | 3.6                            | 6.28                      |
| AOH-T               | N---H-N                   | 8.4                                       | 7.3                            | 8.89                      |
|                     | N-H---O(CH <sub>3</sub> ) | 3.7                                       | 3.8                            | 6.40                      |
|                     | O-H---O                   | 5.6                                       | 5.5                            | 8.01                      |
|                     |                           |                                           |                                |                           |
|                     |                           |                                           |                                |                           |

\*Hydrogen bonding strengths are in good agreement the literature. H. Szatyłowicz, and N. Sadlej-Sosnowska, *J. Chem. Inf. Model.*, **2010**, *50*, 2151–2161

Table S4: The deprotonation energies of the ANH<sub>2</sub> and AOH nucleobases before and after lithiation.

| Base             | Deprotonation Energy |
|------------------|----------------------|
| ANH <sub>2</sub> | 612.779              |
| ANHLi            | 590.34               |
| AOH              | 620.599              |
| AOLi             | 597.632              |
|                  |                      |

Table S5: Topological analysis of noncovalent hydrogen bonding interactions calculated using the M06-2X/6-31+G\*\* level of theory obtained wave function.<sup>a</sup>

|                                     |              |        |        |       |       |
|-------------------------------------|--------------|--------|--------|-------|-------|
| <sup>Br</sup> ANH <sub>2</sub> -T   | N---H-N      | 0.0349 | 0.0816 | 1.058 | 7.19  |
|                                     | N-H---O(CH3) | 0.0274 | 0.0885 | 0.990 | 6.81  |
| <sup>Br</sup> AOH-T                 | N---H-N      | 0.0413 | 0.0937 | 1.092 | 8.84  |
|                                     | N-H---O(CH3) | 0.0259 | 0.0804 | 1.007 | 6.39  |
| <sup>COOH</sup> ANH <sub>2</sub> -T | O-H---O      | 0.0340 | 0.1137 | 0.955 | 8.15  |
|                                     | N---H-N      | 0.0348 | 0.0817 | 1.057 | 7.18  |
| <sup>COOH</sup> AOHT                | N-H---O(CH3) | 0.0275 | 0.0886 | 0.990 | 6.81  |
|                                     | N-H---O      | 0.0251 | 0.0808 | 0.997 | 6.30  |
| <sup>OH</sup> ANH <sub>2</sub> -T   | N---H-N      | 0.0348 | 0.0814 | 1.058 | 7.17  |
|                                     | N-H---O(CH3) | 0.0273 | 0.0882 | 0.991 | 6.79  |
| <sup>OH</sup> AOH-T                 | O-H---O      | 0.0251 | 0.0810 | 0.996 | 6.31  |
|                                     | N---H-N      | 0.0378 | 0.0865 | 1.074 | 7.87  |
| <sup>OMe</sup> ANH <sub>2</sub> -T  | N-H---O(CH3) | 0.0265 | 0.0847 | 0.997 | 6.60  |
|                                     | N-H---O      | 0.0240 | 0.0759 | 1.008 | 6.05  |
| <sup>OMe</sup> AOH-T                | N---H-N      | 0.0411 | 0.0926 | 1.093 | 8.76  |
|                                     | N-H---O(CH3) | 0.0256 | 0.0797 | 1.007 | 6.35  |
| <sup>OMe</sup> AOH-T                | O-H---O      | 0.0333 | 0.1119 | 0.954 | 8.01  |
|                                     | N---H-N      | 0.0383 | 0.0871 | 1.078 | 7.98  |
| <sup>OMe</sup> AOH-T                | N-H---O(CH3) | 0.0262 | 0.0834 | 0.999 | 6.54  |
|                                     | N-H---O      | 0.0242 | 0.0769 | 1.007 | 6.11  |
| AOLi-T-2W                           | N---H-N      | 0.0414 | 0.0927 | 1.096 | 8.82  |
|                                     | N-H---O(CH3) | 0.0256 | 0.0800 | 1.007 | 6.36  |
| AOLi-T                              | O-H---O      | 0.0331 | 0.1112 | 0.955 | 7.97  |
|                                     | N---H-N      | 0.0313 | 0.0764 | 1.051 | 6.64  |
| ANHLi-T-2W                          | O-Li-O       | 0.0303 | 0.2219 | 0.757 | 10.61 |
|                                     | N-H---O      | 0.0218 | 0.0694 | 1.012 | 5.57  |
| ANHLi-T                             | (A)N---OH(W) | 0.0371 | 0.0968 | 1.058 | 8.52  |
|                                     | N---H-N      | 0.0667 | 0.0929 | 1.394 | 16.75 |
| AOLi-T-2W-COOH                      | O-Li-O       | 0.0407 | 0.3215 | 0.781 | 16.15 |
|                                     | N-H---O      | 0.0272 | 0.0883 | 0.999 | 6.91  |
| AOLi-T-2W-NO <sub>2</sub>           | N---H-N      | 0.0253 | 0.0642 | 1.046 | 5.52  |
|                                     | N-Li-O       | 0.0296 | 0.2130 | 0.760 | 10.24 |
| AOLi-T-2W-OH                        | N-H---O      | 0.0176 | 0.0570 | 1.002 | 4.49  |
|                                     | (A)N---OH(W) | 0.0517 | 0.1119 | 1.179 | 12.61 |
| AOLi-T-2W-OMe                       | N---H-N      | 0.0623 | 0.0964 | 1.333 | 15.11 |
|                                     | N-Li-O       | 0.0405 | 0.3129 | 0.785 | 15.88 |
| AOLi-T-2W-OH                        | N-H---O      | 0.0235 | 0.0725 | 1.028 | 6.02  |
|                                     | N---H-N      | 0.0315 | 0.0775 | 1.048 | 6.70  |
| AOLi-T-2W-OMe                       | O-Li-O       | 0.0307 | 0.2257 | 0.758 | 10.80 |
|                                     | N-H---O      | 0.0224 | 0.0716 | 1.008 | 5.71  |
| AOLi-T-2W-NO <sub>2</sub>           | (A)N---OH(W) | 0.0336 | 0.0914 | 1.038 | 7.74  |
|                                     | N---H-N      | 0.0301 | 0.0747 | 1.043 | 6.38  |
| AOLi-T-2W-OH                        | O-Li-O       | 0.0305 | 0.2241 | 0.757 | 10.71 |
|                                     | N-H---O      | 0.0232 | 0.0748 | 1.003 | 5.90  |
| AOLi-T-2W-OMe                       | (A)N---OH(W) | 0.0314 | 0.0870 | 1.029 | 7.23  |
|                                     | N---H-N      | 0.0330 | 0.0799 | 1.056 | 7.01  |
| AOLi-T-2W-OMe                       | O-Li-O       | 0.0310 | 0.2277 | 0.758 | 10.91 |
|                                     | N-H---O      | 0.0213 | 0.0673 | 1.015 | 5.45  |
| AOLi-T-2W-OMe                       | (A)N---OH(W) | 0.0368 | 0.0965 | 1.056 | 8.47  |
|                                     | N---H-N      | 0.0332 | 0.0803 | 1.057 | 7.06  |
| AOLi-T-2W-OMe                       | O-Li-O       | 0.0310 | 0.2283 | 0.758 | 10.94 |
|                                     | N-H---O      | 0.0215 | 0.0678 | 1.015 | 5.48  |
| AOLi-T-2W-OMe                       | (A)N---OH(W) | 0.0373 | 0.0973 | 1.059 | 8.59  |

<sup>a</sup>: W in parenthesis indicates that the corresponding group/atom participates from the water molecule and A indicates adenine unit.
